# Supplementary material for: Prevalence, Characteristics, and Associated Risk Factors of Wrist Fractures in Americans Above 50: The Cross-Sectional NHANES Study
Source: PubMed Central journal article supplement (PMC9082306; doi:10.3389/fendo.2022.800129), 2022-04-25
Supplement: DataSheet_1.pdf [file DataSheet_1.pdf]

**Prevalence, characteristics, and associated risk factors of Wrist fractures in Americans above 50: the cross-sectional NHANES study**

Juncai Ye <sup>1</sup>, Qiao Li <sup>2</sup> and Jing Nie <sup>3\*</sup>

<sup>1</sup>Orthopedics Department, Zhejiang Hospital, Hangzhou, Zhejiang, China

<sup>2</sup>The Second Clinical Medical College of Zhejiang Chinese Medical University, Hangzhou, Zhejiang Province, China

<sup>3</sup>Department of Orthopedics, Traumatology and Orthopedics Hospital of Traditional Chinese Medicine of Xiaoshan District, Hangzhou, Zhejiang Province, China

Correspondence\*: Jing Nie, Orthopedics Department, Traumatology and Orthopedics Hospital of Traditional Chinese Medicine of Xiaoshan District, Hangzhou, Zhejiang Province 311261, China.

E-mail: [drjingnie@126.com](mailto:drjingnie@126.com)

**Supplement**

**Table S1 Relationship between gender and prevalence of wrist fractures**

| Sex                       | Total           | Male            | Female         | P value |
|---------------------------|-----------------|-----------------|----------------|---------|
| Wrist Fracture % [95% CI] | 12.0[10.7,13.5] | 12.8[10.8,15.0] | 11.4[9.9,13.2] | 0.267   |

**Table S2 Relationship between race and prevalence of wrist fractures.**

| Race                      | Mexican-American | Other Hispanic | Non-Hispanic White | Non-Hispanic Black | Other Race- Including Multi-Racial |
|---------------------------|------------------|----------------|--------------------|--------------------|------------------------------------|
| Wrist Fracture % [95% CI] | 7.6[4.5,12.7]    | 7.3[5.7,9.3]   | 14.0[12.2,16.0]    | 6.9[5.4,8.8]       | 6.7[4.3,10.3]                      |

**Table S3 Comparisons of prevalence of wrist fracture among race**

| Parameters                                                | P value   |
|-----------------------------------------------------------|-----------|
| Other Hispanic vs Mexican American                        | 0.966742  |
| Non-Hispanic White vs Mexican American                    | 0.000065  |
| Non-Hispanic Black vs Mexican American                    | 0.99975   |
| Other Race - Including Multi-Racial vs Mexican American   | 0.852419  |
| Non-Hispanic White vs Other Hispanic                      | 0.008834  |
| Non-Hispanic Black vs Other Hispanic                      | 0.896913  |
| Other Race - Including Multi-Racial vs Other Hispanic     | 0.486371  |
| Non-Hispanic Black vs Non-Hispanic White                  | <0.000001 |
| Other Race - Including Multi-Racial vs Non-Hispanic White | <0.000001 |
| Other Race - Including Multi-Racial vs Non-Hispanic Black | 0.863373  |

**Table S4 univariate and multivariate analysis of Wrist Fracture in sex**

| Parameters                          | Univariate analysis |         | Multivariate analysis |         |
|-------------------------------------|---------------------|---------|-----------------------|---------|
|                                     | OR[95CI]            | P value | OR[95CI]              | P value |
| <b>Male</b>                         |                     |         |                       |         |
| Age                                 | 0.99[0.98, 1.01]    | 0.4868  | -                     |         |
| <b>Race</b>                         |                     |         |                       |         |
| Mexican American                    | 1[reference]        |         | 1[reference]          |         |
| Other Hispanic                      | 0.7[0.3, 1.6]       | 0.4008  | 0.73[0.32, 1.66]      | 0.4582  |
| Non-Hispanic White                  | 1.77[0.9, 3.5]      | 0.1108  | 1.85[0.92, 3.69]      | 0.0974  |
| Non-Hispanic Black                  | 0.92[0.5, 1.69]     | 0.787   | 0.82[0.4, 1.65]       | 0.5798  |
| Other Race - Including Multi-Racial | 0.78[0.28, 2.14]    | 0.6279  | 0.75[0.26, 2.14]      | 0.5997  |
| <b>Marital status</b>               |                     |         |                       |         |
| Living alone                        | 1[reference]        |         | -                     |         |
| Not living                          | 0.79[0.52, 1.18]    | 0.2564  | -                     |         |
| <b>Level of education</b>           |                     |         |                       |         |
| Less than high school               | 1[reference]        |         | -                     |         |
| High school or than                 | 1.15[0.62, 2.12]    | 0.6593  | -                     |         |
| <b>Drinking</b>                     |                     |         |                       |         |
| Never                               | 1[reference]        |         | 1[reference]          |         |
| Occasional drink                    | 1.01[0.61, 1.68]    | 0.9591  | 1.08[0.74, 1.45]      | 0.8647  |
| Frequent drink                      | 1.32[1.05, 2.19]    | 0.0412  | 1.47[1.12, 2.25]      | 0.0412  |
| <b>Smoking status</b>               |                     |         |                       |         |
| Never smoker                        | 1[reference]        |         | 1[reference]          |         |
| Past smoker                         | 1.54[0.96, 2.49]    | 0.0845  | 1.52[0.94, 2.45]      | 0.1036  |
| Current smoker                      | 1.47[0.89, 2.43]    | 0.1449  | 1.74[1.07, 2.81]      | 0.0351  |
| <b>Hypertension</b>                 |                     |         |                       |         |
| NO                                  | 1[reference]        |         | -                     |         |
| YES                                 | 0.85[0.56, 1.28]    | 0.4448  | -                     |         |

|                                           |                  |        |                  |        |
|-------------------------------------------|------------------|--------|------------------|--------|
| Diabetes mellitus                         |                  |        |                  |        |
| NO                                        | 1[reference]     |        | 1[reference]     |        |
| YES                                       | 1.34[1.01, 1.78] | 0.0515 | 1.33[0.99, 1.79] | 0.0705 |
| Heart failure                             |                  |        |                  |        |
| NO                                        | 1[reference]     |        | -                |        |
| YES                                       | 1.15[0.69, 1.92] | 0.6004 | -                |        |
| Stroke                                    |                  |        |                  |        |
| NO                                        | 1[reference]     |        | -                |        |
| YES                                       | 1.02[0.55, 1.9]  | 0.9521 | -                |        |
| Every taken prednisone or cortisone daily |                  |        |                  |        |
| NO                                        | 1[reference]     |        | 1[reference]     |        |
| YES                                       | 1.6[0.86, 2.97]  | 0.1459 | 1.48[0.73, 2.99] | 0.2843 |
| Osteoporosis                              |                  |        |                  |        |
| NO                                        | 1[reference]     |        | 1[reference]     |        |
| YES                                       | 1.37[1.12, 2.92] | 0.0163 | 1.24[1.05, 2.45] | 0.0463 |
| History of Parents wrist fractures        |                  |        |                  |        |
| NO                                        | 1[reference]     |        | -                |        |
| YES                                       | 1.41[0.76, 2.61] | 0.2794 | -                |        |
| Obesity                                   |                  |        |                  |        |
| NO                                        |                  |        | 1[reference]     |        |
| YES                                       | 1.45[1.03, 2.02] | 0.0403 | 1.32[1.14, 1.86] | 0.0077 |
| Chronic kidney diseases                   |                  |        |                  |        |
| NO                                        | 1[reference]     |        | -                |        |
| YES                                       | 1.11[0.54, 2.3]  | 0.7807 | -                |        |
| Serum phosphate                           | 1.18[1.01, 1.35] | 0.014  | 1.56[1.24, 1.78] | 0.0247 |
| Serum calcium                             | 0.94[0.87, 1.22] | 0.267  | -                |        |
| Female                                    |                  |        |                  |        |
| Age                                       | 1.01[1.0, 1.03]  | 0.0892 | 1.01[0.99, 1.03] | 0.2237 |
| Race                                      |                  |        |                  |        |
| Mexican American                          | 1[reference]     |        | 1[reference]     |        |
| Other Hispanic                            | 1.29[0.77, 2.17] | 0.3497 | 1.29[0.78, 2.14] | 0.3329 |
| Non-Hispanic White                        | 2.26[1.29, 3.98] | 0.0088 | 2.08[1.13, 3.84] | 0.0314 |
| Non-Hispanic Black                        | 0.93[0.48, 1.82] | 0.8428 | 0.94[0.71, 1.78] | 0.6452 |
| Other Race - Including Multi-Racial       | 1.01[0.49, 2.11] | 0.9742 | 1.09[0.54, 2.17] | 0.8175 |
| Marital status                            |                  |        |                  |        |
| Living alone                              | 1[reference]     |        | -                |        |
| Not living                                | 1.21[0.91, 1.62] | 0.2001 | -                |        |
| Level of education                        |                  |        |                  |        |
| Less than high school                     | 1[reference]     |        | -                |        |
| High school or than                       | 1.15[0.64, 2.06] | 0.6428 | -                |        |
| Drinking                                  |                  |        |                  |        |

|                                              |                  |             |                  |         |
|----------------------------------------------|------------------|-------------|------------------|---------|
| Never                                        | 1[reference]     |             | 1[reference]     |         |
| Occasional drink                             | 0.94[0.74, 1.19] | 0.6248      | 0.88[0.65, 1.2]  | 0.4389  |
| Frequent drink                               | 4.16[2.53, 6.85] | <<br>0.0001 | 3.39[1.75, 6.53] | 0.002   |
| Smoking status                               |                  |             |                  |         |
| Never smoker                                 | 1[reference]     |             | 1[reference]     |         |
| Past smoker                                  | 1.25[0.79, 1.98] | 0.3394      | 1[0.59, 1.68]    | 0.9991  |
| Current smoker                               | 2.41[1.59, 3.65] | 0.0003      | 1.72[1.06, 2.8]  | 0.0423  |
| Hypertension                                 |                  |             |                  |         |
| NO                                           | 1[reference]     |             | -                |         |
| YES                                          | 1.21[0.72, 2.03] | 0.4719      | -                |         |
| Diabetes mellitus                            |                  |             |                  |         |
| NO                                           | 1[reference]     |             | -                |         |
| YES                                          | 0.91[0.62, 1.34] | 0.6386      | -                |         |
| Heart failure                                |                  |             |                  |         |
| NO                                           | 1[reference]     |             | -                |         |
| YES                                          | 1.36[0.7, 2.64]  | 0.3735      | -                |         |
| Stroke                                       |                  |             |                  |         |
| NO                                           | 1[reference]     |             | -                |         |
| YES                                          | 1.3[0.8, 2.12]   | 0.3014      | -                |         |
| Every taken prednisone or<br>cortisone daily |                  |             |                  |         |
| NO                                           | 1[reference]     |             | 1[reference]     |         |
| YES                                          | 1.83[0.97, 3.47] | 0.0736      | 1.64[0.9, 3.01]  | 0.1253  |
| Osteoporosis                                 |                  |             |                  |         |
| NO                                           | 1[reference]     |             | 1[reference]     |         |
| YES                                          | 2.78[2, 3.88]    | <0.0001     | 2.32[1.69, 3.17] | <0.0001 |
| History of Parents wrist<br>fractures        |                  |             |                  |         |
| NO                                           | 1[reference]     |             | 1[reference]     |         |
| YES                                          | 1.59[1.12, 2.24] | 0.0138      | 1.24[0.8, 1.92]  | 0.347   |
| Obesity                                      |                  |             |                  |         |
| NO                                           | 1[reference]     |             | 1[reference]-    |         |
| YES                                          | 1.1[1.02, 1.45]  | 0.0406      | 1.08[1.03, 1.26] | 0.0325  |
| Chronic kidney diseases                      |                  |             |                  |         |
| NO                                           | 1[reference]     |             | 1[reference]     |         |
| YES                                          | 1.01[0.98, 1.31] | 0.0834      | 1.12[0.94, 1.56] | 0.065   |
| Serum phosphite                              | 1.27[1.08, 1.51] | 0.038       | 1.42[1.31, 1.71] | 0.0046  |
| Serum calcium                                | 0.94[0.87, 1.22] | 0.267       | -                |         |

**Table S5 univariate and multivariate analysis of Wrist Fracture in race**

| Parameters                                   | Univariate analysis |         | Multivariate analysis |         |
|----------------------------------------------|---------------------|---------|-----------------------|---------|
|                                              | OR[95CI]            | P value | OR[95CI]              | P value |
| <b>Mexican American</b>                      |                     |         |                       |         |
| Age                                          | 1.01[0.97, 1.04]    | 0.6409  | -                     |         |
| Sex                                          |                     |         |                       |         |
| men                                          | 1[reference]        |         | -                     |         |
| Female                                       | 0.75[0.42, 1.35]    | 0.3422  | -                     |         |
| Marital status                               |                     |         |                       |         |
| Living alone                                 |                     |         |                       |         |
| Not living                                   | 1.02[0.56, 1.86]    | 0.9585  |                       |         |
| Level of education                           |                     |         |                       |         |
| Less than high school                        | 1[reference]        |         | -                     |         |
| More than high school                        | 0.47[0.14, 1.61]    | 0.2298  | -                     |         |
| Drinking                                     |                     |         |                       |         |
| Never                                        | 1[reference]        |         | 1[reference]          |         |
| Occasional drink                             | 1.33[0.72, 2.47]    | 0.3666  | 1.21[0.84, 2.12]      | 0.1576  |
| Frequent drink                               | 1.83[1.3, 2.3]      | 0.0229  | 1.42[1.21, 1.8]       | 0.0345  |
| Smoking status                               |                     |         |                       |         |
| Never smoker                                 | 1[reference]        |         | 1[reference]          |         |
| Past smoker                                  | 1.01[0.38, 2.74]    | 0.9783  | 1.14[0.92, 1.57]      |         |
| Current smoker                               | 1.46[0.88, 2.22]    | 0.1329  | 1.55[1.27, 2.1]       | 0.0025  |
| Hypertension                                 |                     |         |                       |         |
| NO                                           | 1[reference]        |         | -                     |         |
| YES                                          | 1.14[0.58, 2.23]    | 0.7077  | -                     |         |
| Diabetes mellitus                            |                     |         |                       |         |
| NO                                           | 1[reference]        |         | -                     |         |
| YES                                          | 0.7[0.37, 1.34]     | 0.2847  | -                     |         |
| Heart failure                                |                     |         |                       |         |
| NO                                           | 1[reference]        |         | 1[reference]          |         |
| YES                                          | 2.48[0.82, 7.52]    | 0.1077  | 1.49[0.4, 5.51]       | 0.5481  |
| Stroke                                       |                     |         |                       |         |
| NO                                           | 1[reference]        |         | -                     |         |
| YES                                          | 1.63[0.47, 5.63]    | 0.4371  | -                     |         |
| Every taken prednisone or<br>cortisone daily |                     |         |                       |         |
| NO                                           | 1[reference]        |         | -                     |         |
| YES                                          | 0.88[0.2, 3.79]     | 0.861   | -                     |         |
| Osteoporosis                                 |                     |         |                       |         |
| NO                                           | 1[reference]        |         | 1[reference]          |         |
| YES                                          | 2.59[1.14, 5.85]    | 0.0227  | 3.81[1.44, 10.04]     | 0.0068  |
| History of Parents wrist                     |                     |         |                       |         |

|                                              |                    |        |                  |        |
|----------------------------------------------|--------------------|--------|------------------|--------|
| fractures                                    |                    |        |                  |        |
| NO                                           | 1[reference]       |        | -                |        |
| YES                                          | 1.25[0.54, 2.87]   | 0.6068 | -                |        |
| Obesity                                      |                    |        |                  |        |
| NO                                           | 1[reference]       |        | 1[reference]     |        |
| YES                                          | 2.01[1.07, 3.74]   | 0.0287 | 2.08[1.1, 3.95]  | 0.0248 |
| Chronic kidney diseases                      |                    |        |                  |        |
| NO                                           | 1[reference]       |        | 1[reference]     |        |
| YES                                          | 0.67[0.36, 1.22]   | 0.1921 | 1.37[0.88, 1.75] | 0.1271 |
| Phosphate                                    | 2.83[1.62, 4.92]   | 0.0002 | 1.78[1.24, 3.63] | 0.004  |
| Calcium                                      | 1.04[0.67, 1.6]    | 0.8714 | -                |        |
| <hr/>                                        |                    |        |                  |        |
| Other Hispanic                               |                    |        |                  |        |
| <hr/>                                        |                    |        |                  |        |
| Age                                          | 1.01[0.99, 1.03]   | 0.3422 | -                |        |
| Sex                                          |                    |        |                  |        |
| men                                          | 1[reference]       |        | -                |        |
| Female                                       | 2191323.45[0, Inf] | 0.9841 | -                |        |
| Marital status                               |                    |        |                  |        |
| Living alone                                 | 1[reference]       |        | -                |        |
| Not living                                   | 0.79[0.38, 1.64]   | 0.5353 | -                |        |
| Level of education                           |                    |        |                  |        |
| Less than high school                        | 1[reference]       |        | -                |        |
| More than high school                        | 0.63[0.23, 1.72]   | 0.3705 | -                |        |
| Drinking                                     |                    |        |                  |        |
| Never                                        | 1[reference]       |        | 1[reference]     |        |
| Occasional drink                             | 1.1[0.52, 2.34]    | 0.8018 | 0.87[0.44, 1.71] | 0.6898 |
| Frequent drink                               | 1.01[0.89, 1.5]    | 0.1292 | 1.11[1.02, 2.6]  | 0.0467 |
| Smoking status                               |                    |        |                  |        |
| Never smoker                                 | 1[reference]       |        | -                |        |
| Past smoker                                  | 0.92[0.41, 2.05]   | 0.8417 | -                |        |
| Current smoker                               | 1.49[0.5, 4.42]    | 0.4744 | -                |        |
| Hypertension                                 |                    |        |                  |        |
| NO                                           | 1[reference]       |        | -                |        |
| YES                                          | 2.09[0.34, 12.74]  | 0.4238 | -                |        |
| Diabetes mellitus                            |                    |        |                  |        |
| NO                                           | 1[reference]       |        | -                |        |
| YES                                          | 0.97[0.46, 2.03]   | 0.9295 | -                |        |
| Heart failure                                |                    |        |                  |        |
| NO                                           | 1[reference]       |        | -                |        |
| YES                                          | 1.56[0.67, 3.64]   | 0.2989 | -                |        |
| Stroke                                       |                    |        |                  |        |
| NO                                           | 1[reference]       |        | -                |        |
| YES                                          | 0.86[0.4, 1.87]    | 0.7081 | -                |        |
| Every taken prednisone or<br>cortisone daily |                    |        |                  |        |

|                                    |                  |        |                  |        |
|------------------------------------|------------------|--------|------------------|--------|
| NO                                 | 1[reference]     |        | -                |        |
| YES                                | 1.89[0.56, 6.47] | 0.3074 | -                |        |
| Osteoporosis                       |                  |        |                  |        |
| NO                                 | 1[reference]     |        | 1[reference]     |        |
| YES                                | 2.84[1.06, 7.61] | 0.0375 | 1.06[1.01, 1.24] | 0.04   |
| History of Parents wrist fractures |                  |        |                  |        |
| NO                                 | 1[reference]     |        | -                |        |
| YES                                | 0.94[0.35, 2.53] | 0.9045 | -                |        |
| Obesity                            |                  |        |                  |        |
| NO                                 | 1[reference]     |        | 1[reference]     |        |
| YES                                | 1.87[0.94, 3.73] | 0.0736 | 1.01[3.65, 0.05] | 0.05   |
| Chronic kidney diseases            |                  |        |                  |        |
| NO                                 | 1[reference]     |        | -                |        |
| YES                                | 0.94[0.91, 1.02] | 0.984  | 1[reference]     |        |
| Phosphate                          | 1.91[1.42, 2.59] | <0.001 | 1.91[1.42, 2.59] |        |
| Calcium                            | 1.1[0.88, 1.38]  | 0.3857 | -                |        |
| <hr/>                              |                  |        |                  |        |
| Other Hispanic                     |                  |        |                  |        |
| Age                                | 1.48[0.98, 2.23] | 0.0615 | 0.86[0.42, 1.77] | 0.6813 |
| Sex                                |                  |        |                  |        |
| men                                | 1[reference]     |        | 1[reference]     |        |
| Female                             | 0.6[0.32, 1.11]  | 0.1029 | 1.89[1.33, 3.05] | 0.0425 |
| Marital status                     |                  |        |                  |        |
| Living alone                       |                  |        | -                |        |
| Not living                         | 0.97[0.74, 1.26] | 0.8099 | -                |        |
| Level of education                 |                  |        |                  |        |
| Less than high school              | 1[reference]     |        | -                |        |
| More than high school              | 1.11[0.71, 1.74] | 0.6436 | -                |        |
| Drinking                           |                  |        |                  |        |
| Never                              | 1[reference]     |        | 1[reference]     |        |
| Occasional drink                   | 0.88[0.65, 1.18] | 0.3865 | 0.96[0.73, 1.28] | 0.7925 |
| Frequent drink                     | 1.82[1.24, 2.66] | 0.0022 | 1.97[1.36, 2.85] | 0.0003 |
| Smoking status                     |                  |        |                  |        |
| Never smoker                       | 1[reference]     |        | 1[reference]     |        |
| Past smoker                        | 1.2[0.89, 1.61]  | 0.2251 | 1.1[0.83, 1.47]  | 0.496  |
| Current smoker                     | 1.66[1.14, 2.4]  | 0.0074 | 1.53[1.08, 2.16] | 0.0171 |
| Hypertension                       |                  |        |                  |        |
| NO                                 | 1[reference]     |        | -                |        |
| YES                                | 0.96[0.71, 1.29] | 0.7746 | -                |        |
| Diabetes mellitus                  |                  |        |                  |        |
| NO                                 | 1[reference]     |        | -                |        |
| YES                                | 1.13[0.83, 1.54] | 0.4458 | -                |        |
| Heart failure                      |                  |        |                  |        |
| NO                                 | 1[reference]     |        | -                |        |
| YES                                | 0.89[0.54, 1.48] | 0.6625 | -                |        |
| Stroke                             |                  |        |                  |        |
| NO                                 | 1[reference]     |        | -                |        |

|                                              |                  |        |                  |        |
|----------------------------------------------|------------------|--------|------------------|--------|
| YES                                          | 0.83[0.51, 1.35] | 0.4528 | -                |        |
| Every taken prednisone or<br>cortisone daily |                  |        |                  |        |
| NO                                           | 1[reference]     |        | -                |        |
| YES                                          | 1.66[1.11, 2.48] | 0.0145 | -                |        |
| Osteoporosis                                 |                  |        |                  |        |
| NO                                           | 1[reference]     |        | 1[reference]     |        |
| YES                                          | 2.04[1.42, 2.93] | 0.0001 | 2.32[1.65, 3.26] | 0      |
| History of Parents wrist<br>fractures        |                  |        |                  |        |
| NO                                           | 1[reference]     |        | -                |        |
| YES                                          | 1.15[0.83, 1.59] | 0.4091 | -                |        |
| Obesity                                      |                  |        |                  |        |
| NO                                           | 1[reference]     |        | 1[reference]     |        |
| YES                                          | 1.34[1.03, 1.75] | 0.0297 | 1.38[1.07, 1.77] | 0.0122 |
| Chronic kidney diseases                      |                  |        |                  |        |
| NO                                           | 1[reference]     |        | 1[reference]     |        |
| YES                                          | 1.73[0.94, 3.17] | 0.0762 | 1.68[0.93, 3.03] | 0.0839 |
| Phosphate                                    | 2.03[1.07, 3.85] | 0.0297 |                  |        |
| Calcium                                      | 1.16[0.73, 1.83] | 0.5253 | -                |        |
| <hr/>                                        |                  |        |                  |        |
| Non-Hispanic Black                           |                  |        |                  |        |
| <hr/>                                        |                  |        |                  |        |
| Age                                          | 1[0.98, 1.02]    | 0.8769 |                  |        |
| Sex                                          |                  |        |                  |        |
| men                                          | 1[reference]     |        | 1[reference]     |        |
| Female                                       | 0.67[0.39, 1.13] | 0.1333 | 0.78[0.69, 1.52] | 0.3165 |
| Marital status                               |                  |        |                  |        |
| Living alone                                 | 1[reference]     |        | -                |        |
| Not living                                   | 1.19[0.74, 1.93] | 0.4729 | -                |        |
| Level of education                           |                  |        |                  |        |
| Less than high school                        | 1[reference]     |        | -                |        |
| More than high school                        | 1.26[0.67, 2.37] | 0.4807 | -                |        |
| Drinking                                     |                  |        |                  |        |
| Never                                        | 1[reference]     |        | 1[reference]     |        |
| Occasional drink                             | 0.85[0.49, 1.48] | 0.5737 | 0.87[0.69, 1.15] | 0.1165 |
| Frequent drink                               | 1.65[0.82, 3.29] | 0.1587 | 2.06[1.11, 3.81] | 0.0212 |
| Smoking status                               |                  |        |                  |        |
| Never smoker                                 | 1[reference]     |        | -                |        |
| Past smoker                                  | 1.29[0.72, 2.3]  | 0.3918 | -                |        |
| Current smoker                               | 1.33[0.71, 2.46] | 0.3708 | -                |        |
| Hypertension                                 |                  |        |                  |        |
| NO                                           | 1[reference]     |        | -                |        |
| YES                                          | 0.75[0.26, 2.19] | 0.6014 | -                |        |
| Diabetes mellitus                            |                  |        |                  |        |
| NO                                           | 1[reference]     |        | -                |        |



|                                              |                   |        |                  |        |
|----------------------------------------------|-------------------|--------|------------------|--------|
| YES                                          | 1.14[0.68, 1.93]  | 0.6137 | -                |        |
| Heart failure                                |                   |        |                  |        |
| NO                                           | 1[reference]      |        | -                |        |
| YES                                          | 0.91[0.46, 1.81]  | 0.7947 | -                |        |
| Stroke                                       |                   |        |                  |        |
| NO                                           | 1[reference]      |        | -                |        |
| YES                                          | 0.73[0.3, 1.76]   | 0.4844 | -                |        |
| Every taken prednisone or<br>cortisone daily |                   |        |                  |        |
| NO                                           | 1[reference]      |        | -                |        |
| YES                                          | 1.42[0.63, 3.16]  | 0.3956 | -                |        |
| Osteoporosis                                 |                   |        |                  |        |
| NO                                           | 1[reference]      |        | 1[reference]     |        |
| YES                                          | 2.14[0.94, 4.89]  | 0.0713 | 2.46[1.22, 4.99] | 0.0123 |
| History of Parents wrist<br>fractures        |                   |        |                  |        |
| NO                                           | 1[reference]      |        | -                |        |
| YES                                          | 0.9[0.33, 2.49]   | 0.8457 | -                |        |
| Obesity                                      |                   |        |                  |        |
| NO                                           | 1[reference]      |        | 1[reference]     |        |
| YES                                          | 1.08[0.98, 1.28]  | 0.1221 | 0.78[0.5, 1.23]  | 0.2934 |
| Chronic kidney diseases                      |                   |        |                  |        |
| NO                                           | 1[reference]      |        | -                |        |
| YES                                          | 0.61[0.25, 1.47]  | 0.268  | -                |        |
| Phosphate                                    | 2.42[1.35, 4.32]  | 0.0028 |                  |        |
| Calcium                                      | 0.96[0.73, 1.27]  | 0.7969 | -                |        |
| <hr/>                                        |                   |        |                  |        |
| Other Race - Including                       |                   |        |                  |        |
| Multi-Racial                                 |                   |        |                  |        |
| <hr/>                                        |                   |        |                  |        |
| Age                                          | 0.64[0.2, 2.01]   | 0.4401 | -                |        |
| Sex                                          |                   |        |                  |        |
| men                                          | 1[reference]      |        | -                |        |
| Female                                       | 1.46[0.16, 13.49] | 0.7393 | -                |        |
| Marital status                               |                   |        |                  |        |
| Living alone                                 |                   |        | -                |        |
| Not living                                   | 1.1[0.53, 2.28]   | 0.7931 | -                |        |
| Level of education                           |                   |        |                  |        |
| Less than high school                        | 1[reference]      |        | -                |        |
| More than high school                        | 1.04[0.43, 2.53]  | 0.9287 | -                |        |
| Drinking                                     |                   |        |                  |        |
| Never                                        | 1[reference]      |        | 1[reference]     |        |
| Occasional drink                             | 1.86[0.86, 4]     | 0.114  | 1.98[0.97, 4.05] | 0.0606 |
| Frequent drink                               | 3.16[1.01, 9.86]  | 0.0477 | 2.99[1.03, 8.66] | 0.0434 |

|                                              |                   |        |                   |        |
|----------------------------------------------|-------------------|--------|-------------------|--------|
| Smoking status                               |                   |        |                   |        |
| Never smoker                                 | 1[reference]      |        | 1[reference]      |        |
| Past smoker                                  | 2.71[1.15, 6.38]  | 0.0222 | 2.26[1.03, 4.94]  | 0.0421 |
| Current smoker                               | 5.75[2.18, 15.21] | 0.0004 | 4.35[1.82, 10.38] | 0.0009 |
| Hypertension                                 |                   |        |                   |        |
| NO                                           | 1[reference]      |        | 1[reference]      |        |
| YES                                          | 1.91[0.8, 4.56]   | 0.1438 | 1.57[0.7, 3.53]   | 0.2754 |
| Diabetes mellitus                            |                   |        |                   |        |
| NO                                           | 1[reference]      |        | -                 |        |
| YES                                          | 0.98[0.46, 2.08]  | 0.9603 | -                 |        |
| Heart failure                                |                   |        |                   |        |
| NO                                           | 1[reference]      |        | -                 |        |
| YES                                          | 0[0, Inf]         | 0.9852 | -                 |        |
| Stroke                                       |                   |        |                   |        |
| NO                                           | 1[reference]      |        | -                 |        |
| YES                                          | 1.14[0.32, 4.1]   | 0.8405 | -                 |        |
| Every taken prednisone or<br>cortisone daily |                   |        |                   |        |
| NO                                           | 1[reference]      |        | -                 |        |
| YES                                          | 2.05[0.6, 6.95]   | 0.2518 | -                 |        |
| Osteoporosis                                 |                   |        |                   |        |
| NO                                           | 1[reference]      |        | 1[reference]      |        |
| YES                                          | 3.2[1.36, 7.49]   | 0.0075 | 3.68[1.71, 7.89]  | 0.0008 |
| History of Parents wrist<br>fractures        |                   |        |                   |        |
| NO                                           | 1[reference]      |        | 1[reference]      |        |
| YES                                          | 0.22[0.05, 1.03]  | 0.0548 | 0.22[0.05, 1.02]  | 0.0528 |
| Obesity                                      |                   |        |                   |        |
| NO                                           | 1[reference]      |        | -                 |        |
| YES                                          | 0.72[0.28, 1.84]  | 0.4913 | -                 |        |
| Chronic kidney diseases                      |                   |        |                   |        |
| NO                                           | 1[reference]      |        | -                 |        |
| YES                                          | 1.62[0.18, 14.99] | 0.6698 | -                 |        |
| Phosphate                                    | 2.95[1.73, 5.04]  | 0.0001 | 1[reference]      |        |
| Calcium                                      | 0.82[0.48, 1.41]  | 0.478  | 0.74[0.31, 1.78]  | 0.4962 |
